# Supplementary material for: Solvothermal and mechanochemical intercalation of Cu into La2O2S2 enabled by the redox reactivity of (S2)2− pairs
Source: Royal Society of Chemistry journal article supplement (doi:10.1039/d1dt01976g), 2021-01-01
Supplement: d1dt01976g1.pdf [file d1dt01976g1.pdf]

## **Supplementary Information**

### **Solvothermal and mechanochemical intercalation of Cu into $\text{La}_2\text{O}_2\text{S}_2$ enabled by the redox reactivity of $(\text{S}_2)^{2-}$ pairs**

# Experimental procedures

## 1. X-ray diffraction

Powder X-ray diffraction (XRD) patterns were recorded at room temperature on a Bruker D8 Advance Diffractometer (Bragg-Brentano geometry,  $\theta$ - $2\theta$ ), which employs Cu  $K_{\alpha 1}$  radiation ( $\lambda = 1.540598 \text{ \AA}$ ) produced through Ge (111) monochromator and LynxEye detector.

## 2. 3D electron diffraction analyses

The brown powder obtained after solid-solid reaction between 2.0 eq. of Cu and  $\text{La}_2\text{O}_2\text{S}_2$  was used for TEM analyses. The powder sample was dispersed in ethanol and a drop of the suspension was deposited and dried on a copper grid with a thin film of holey amorphous carbon. 3D electron diffraction (3D ED) data sets<sup>1,2</sup> were collected with the precession electron diffraction tomography (PEDT) technique<sup>3-6</sup> on a Philips CM120 electron transmission microscope (TEM) ( $V_{\text{acc}}=120 \text{ kV}$ ,  $\text{LaB}_6$ ) coupled with the precession device Nanomegas Digistar and a side-mounted CCD camera Olympus Veleta with 14-bit dynamic range. Non-oriented patterns were recorded stepwise at the ambient temperature on 2 nanocrystals (Fig. 3) with  $\sim 200 \text{ nm}$  diameter. The precession angle was set to 1 degree with a tilt step of 1 degree. A condenser aperture of  $10 \text{ }\mu\text{m}$  and low illumination setting (spot size 7) were used to preserve the crystal during the data collection. PEDT data were analyzed using the computer programs PETS2.0<sup>7</sup> and JANA2006.<sup>8</sup> For each data set, two lists of  $hkl$ -indices with associated intensities and estimated standard deviations are obtained: one for the structure solution and another one for the dynamical refinement. We adopted the parameters suggested by Palatinus et al.<sup>9-10</sup> to select reflections involved in the dynamic refinement:  $RSg(\text{max}) = 0.65$ ,  $Sg(\text{max}) (\text{matrix}) = 0.01 \text{ \AA}^{-1}$  and  $g(\text{max}) = 1.7 \text{ \AA}^{-1}$ .

# Results

## 1. 3D electron diffraction analyses

The analysis of the PEDT data gives a tetragonal unit-cell with  $a \approx 4.01(1)$  Å, and  $c \approx 8.46(6)$  Å that is consistent with our previous Rietveld refinement for the intercalated phase ( $a = 3.9982(5)$  Å and  $c = 8.5125(3)$  Å)<sup>13</sup> as well as the powder sample prepared by high-temperature synthesis at  $T = 800$  °C ( $a = 3.99625(5)$  Å and  $c = 8.51743(9)$  Å).<sup>11</sup> The space group  $P4/nmm$  is compatible with the sections of the reciprocal space (Fig. S1). The model was solved in JANA2006 using the charge flipping algorithm in the program Superflip.<sup>12</sup> Two data sets were combined to reach 90% coverage (for  $\theta = 1.34$  deg) in the  $P4/nmm$  space group with 119/125 observed over all independent reflections (averaged from the 1625/1792 measured). The refined atomic positions for lanthanum  $z/c = 0.1439(3)$  and sulfur  $z/c = 0.6729(1)$ , which are comparable to our previous refinement based on XRD data ( $z/c = 0.1473(2)$  and  $z/c = 0.6627(4)$  for lanthanum and sulfur, respectively).

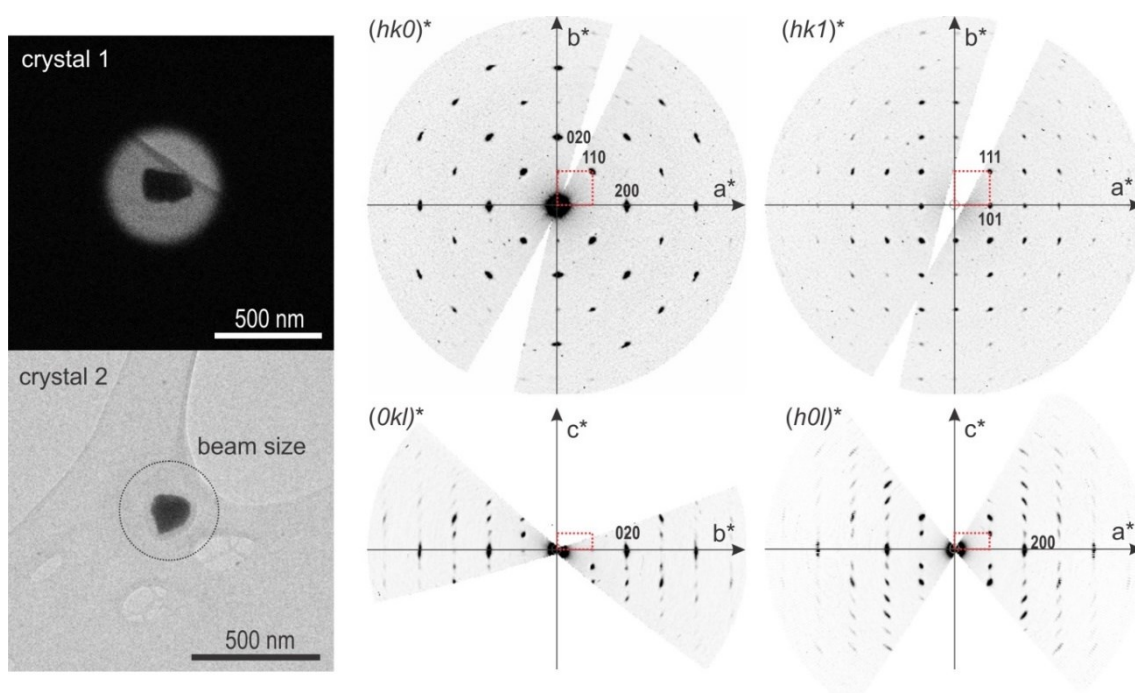

**Fig. S1.** From the left to the right, picture of the two  $\text{La}_2\text{O}_2\text{Cu}_2\text{S}_2$  crystals used in the structural characterization and sections of the reciprocal space reconstructed in PETS2.0. The unit-cell is represented in red.

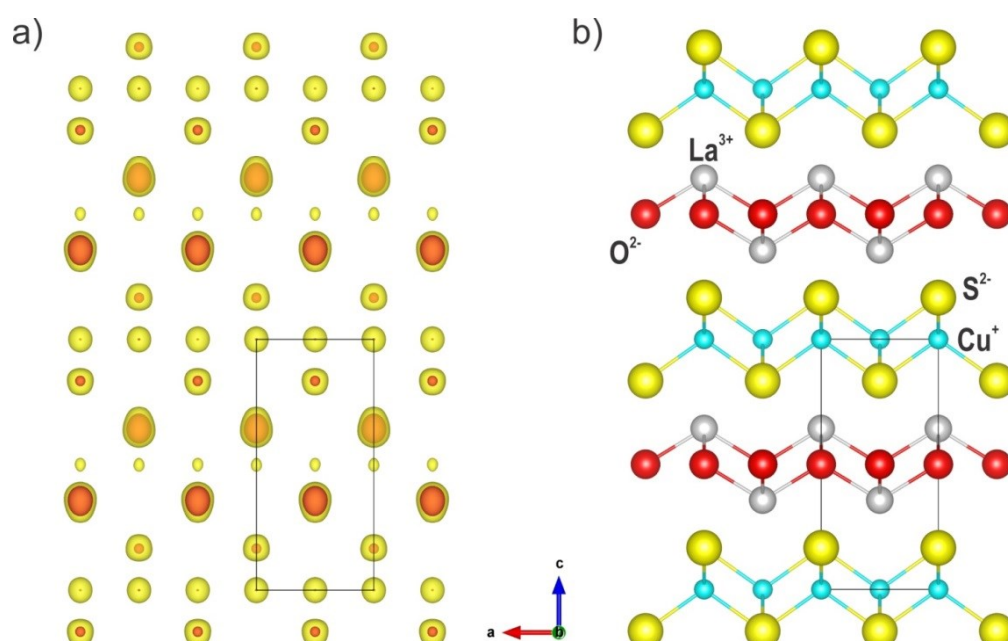

**Fig. S2.** (a) Projection along  $b$  of the 3D electrostatic potential map (direct solution) and, (b) corresponding model for  $\text{La}_2\text{O}_2\text{Cu}_2\text{S}_2$ .

**Table S1.** Summary of PEDT data collection conditions and refinement parameters for  $\text{La}_2\text{O}_2\text{Cu}_2\text{S}_2$ .

| Structural formula                                      | $\text{La}_2\text{O}_2\text{Cu}_2\text{S}_2$               |
|---------------------------------------------------------|------------------------------------------------------------|
| Unit-cell parameters (RXPd)                             | $a = 3.9982(5) \text{ \AA}$ , $c = 8.5125(3) \text{ \AA}$  |
| $V$                                                     | $136.08(1) \text{ \AA}^3$                                  |
| $Z$                                                     | 1                                                          |
| Space group                                             | $P4/nmm$                                                   |
| $d_{\text{calc}} (\text{g} \cdot \text{cm}^{-3})$       | 6.1139 (for the formula given above)                       |
| Temperature                                             | ambient T                                                  |
| Diffractometer                                          | TEM Philips CM120                                          |
| Radiation (wavelength)                                  | electrons, $(0.0335 \text{ \AA})$                          |
| Resolution                                              | $0.1\text{--}0.7 \text{ \AA}^{-1}$                         |
| Limiting Miller indices                                 | $0 \leq h \leq 3$ , $1 \leq k \leq 5$ , $0 \leq l \leq 11$ |
| Coverage                                                | 90%                                                        |
| No. of independent reflections (obs/all)<br>– kinematic | 119/125                                                    |
| $R_{\text{int}}$ (obs/all) – kinematic                  | 0.1674/0.2164                                              |
| Redundancy                                              | 12.237                                                     |
| -----<br>Dynamical refinement by Jana2006:              |                                                            |
| Reflection selection parameter                          | $\text{RS}_g(\text{max}) = 0.65$                           |
| No. of reflections (obs/all)                            | 2339/2905                                                  |
| $R$ , $wR$ (obs)                                        | 0.1261/0.1451                                              |
| $N$ parameters/ $N$ struct. parameters                  | 201/6                                                      |

**Table S2.** Atom positions, displacement parameters (equivalent/isotropic, in Å<sup>2</sup>) for the crystal structure of La<sub>2</sub>O<sub>2</sub>Cu<sub>2</sub>S<sub>2</sub>.

| Atom      | Wyck.   | <i>x/a</i>  | <i>y/b</i> | <i>z/c</i>  | Occ.   | <i>U</i> <sub>iso</sub> (Å <sup>2</sup> ) |
|-----------|---------|-------------|------------|-------------|--------|-------------------------------------------|
| La1       | 2c      | 0           | 0.5        | 0.1439(3)   | 1      | 0.0100(5)                                 |
| Cu1       | 2b      | 0           | 0          | 0.5         | 1      | 0.0332(10)                                |
| S1        | 2c      | 0           | 0.5        | 0.6729(11)  | 1      | 0.0274(11)                                |
| O1        | 2a      | 0           | 0          | 0           | 1      | 0.0043(13)                                |
| distances | Cu1-S1: | 2.482(6) Å, | La1-O1:    | 2.345(1) Å, | O1-O1: | 2.8272 Å                                  |

## References

1. Gemmi, M.; Lanza, A. E. 3D Electron Diffraction Techniques. *Acta Crystallogr. Sect. B Struct. Sci. Cryst. Eng. Mater.* 2019, 75, 495–504. <https://doi.org/10.1107/S2052520619007510>.
2. Gemmi, M.; Mugnaioli, E.; Gorelik, T.; Kolb, U.; Palatinus, L.; Boullay, P.; Hovmöller, S.; Abrahams, J. 3D Electron Diffraction: The Nanocrystallography Revolution. *ACS Cent. Sci.* 2019, 5 (8). <https://doi.org/10.1021/acscentsci.9b00394>.
3. Vincent, R.; Midgley, P. A. Double Conical Beam-Rocking System for Measurement of Integrated Electron Diffraction Intensities. *Ultramicroscopy* 1994, 53 (3), 271–282. [https://doi.org/10.1016/0304-3991\(94\)90039-6](https://doi.org/10.1016/0304-3991(94)90039-6).
4. Kolb, U.; Gorelik, T.; Kübel, C.; Otten, M. T.; Hubert, D. Towards Automated Diffraction Tomography: Part I-Data Acquisition. *Ultramicroscopy* 2007, 107 (6–7), 507–513. <https://doi.org/10.1016/j.ultramic.2006.10.007>.
5. Kolb, U.; Gorelik, T.; Otten, M. T. Towards Automated Diffraction Tomography. Part II-Cell Parameter Determination. *Ultramicroscopy* 2008, 108 (8), 763–772. <https://doi.org/10.1016/j.ultramic.2007.12.002>.
6. Mugnaioli, E.; Gorelik, T.; Kolb, U. “Ab Initio” Structure Solution from Electron Diffraction Data Obtained by a Combination of Automated

Diffraction Tomography and Precession Technique. *Ultramicroscopy* 2009, 109 (6), 758–765. <https://doi.org/10.1016/j.ultramic.2009.01.011>.

7. L. Palatinus, P. Brázda, M. Jelínek, J. Hrdá, G. Steciuk and M. Klementová, Specifics of the data processing of precession electron diffraction tomography data and their implementation in the program PETS2.0. *Acta Crystallographica*, 2019, **B75**, 512–522.
8. V. Petříček, M. Dušek and L. Palatinus, Crystallographic computing system JANA2006: General features. *Z. Für Krist. – Cryst. Mater.* 2014, **229**, 345–352.
9. L. Palatinus, V. Petříček and C. A. Corrêa Structure refinement using precession electron diffraction tomography and dynamical diffraction: theory and implementation. *Acta Crystallogr.* 2015, **A71**, 235–244.
10. L. Palatinus, C. A. Corrêa, G. Steciuk, D. Jacob, P. Roussel, P. Boullay, M. Klementová, M. Gemmi, J. Kopeček, M. C. Domeneghetti, F. Cámara and V. Petříček, Structure refinement using precession electron diffraction tomography and dynamical diffraction: tests on experimental data. *Acta Crystallogr.* 2015, **B71**, 740–751.
11. K. Ueda and H. Hosono, Crystal structure of  $\text{LaCuOS}_{1-x}\text{Se}_x$  oxychalcogenides. *Thin Solid Films* 2002, **411**, 115–118.
12. L. Palatinus, and G. Chapuis, SUPERFLIP - a computer program for the solution of crystal structures by charge flipping in arbitrary dimensions. *Journal of Applied Crystallography* 2007, **40**, 786–790.
